# Supplementary material for: Dual-pulse photoactivated atomic force microscopy
Source: PubMed Central journal article supplement (PMC8384876; doi:10.1038/s41598-021-96646-4), 2021-08-24
Supplement: 41598_2021_96646_MOESM1_ESM.pdf [file 41598_2021_96646_MOESM1_ESM.pdf]

# Supplementary Information

## Dual-pulse Photoactivated Atomic Force Microscopy

### **Authors**

Byullee Park<sup>1†</sup>, Seunghyun Lee<sup>1†</sup>, Jimin Kwon<sup>1</sup>, Woojo Kim<sup>1</sup>, Sungjune Jung<sup>1\*</sup>, and Chulhong Kim<sup>1\*</sup>

### **Affiliations**

<sup>1</sup>Departments of Electrical Engineering, Convergence IT Engineering, Mechanical Engineering, and Medical Device Innovation Center, Pohang University of Science and Technology (POSTECH), Pohang, Republic of Korea 37673.

† These authors contributed equally to this work.

\*Corresponding authors: [chulhong@postech.edu](mailto:chulhong@postech.edu) and [sjung@postech.ac.kr](mailto:sjung@postech.ac.kr)

### **Figures S1-S4**

- **Supplementary Figure 1:** DP- and SP-pAFM images of a DPP-DTT polymer sample, with 160 x 32 data points
- **Supplementary Figure 2:** Comparison of single-pulse (SP)-, double-powered single-pulse, and dual-pulse pAFM (DP-pAFM) signal amplitudes
- **Supplementary Figure 3:** Jittering measurement of heating and detection lasers
- **Supplementary Figure 4:** Comparison of SP and DP-pAFM signal amplitudes

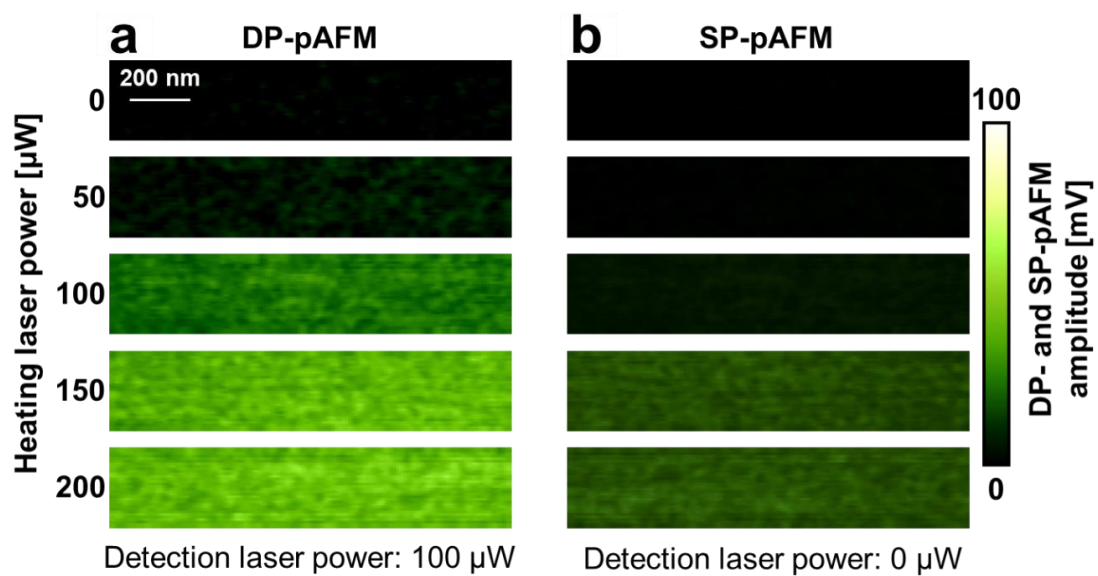

**Supplementary Figure 1.** DP- and SP-pAFM images of a DPP-DTT polymer sample, with  $160 \times 32$  data points. (a) DP- and (b) SP-pAFM amplitude images captured while increasing the heating laser power from 0 to 200  $\mu\text{W}$  at fixed detection laser powers of 100 and 0  $\mu\text{W}$ , respectively. The total number of scanned points is  $160 \times 23$ . DP-pAFM, dual-pulse pAFM; SP-pAFM, single-pulse pAFM; DPP-DTT, diketopyrrolo-pyrrole-dithienylthieno [3,2-b]thiophene.

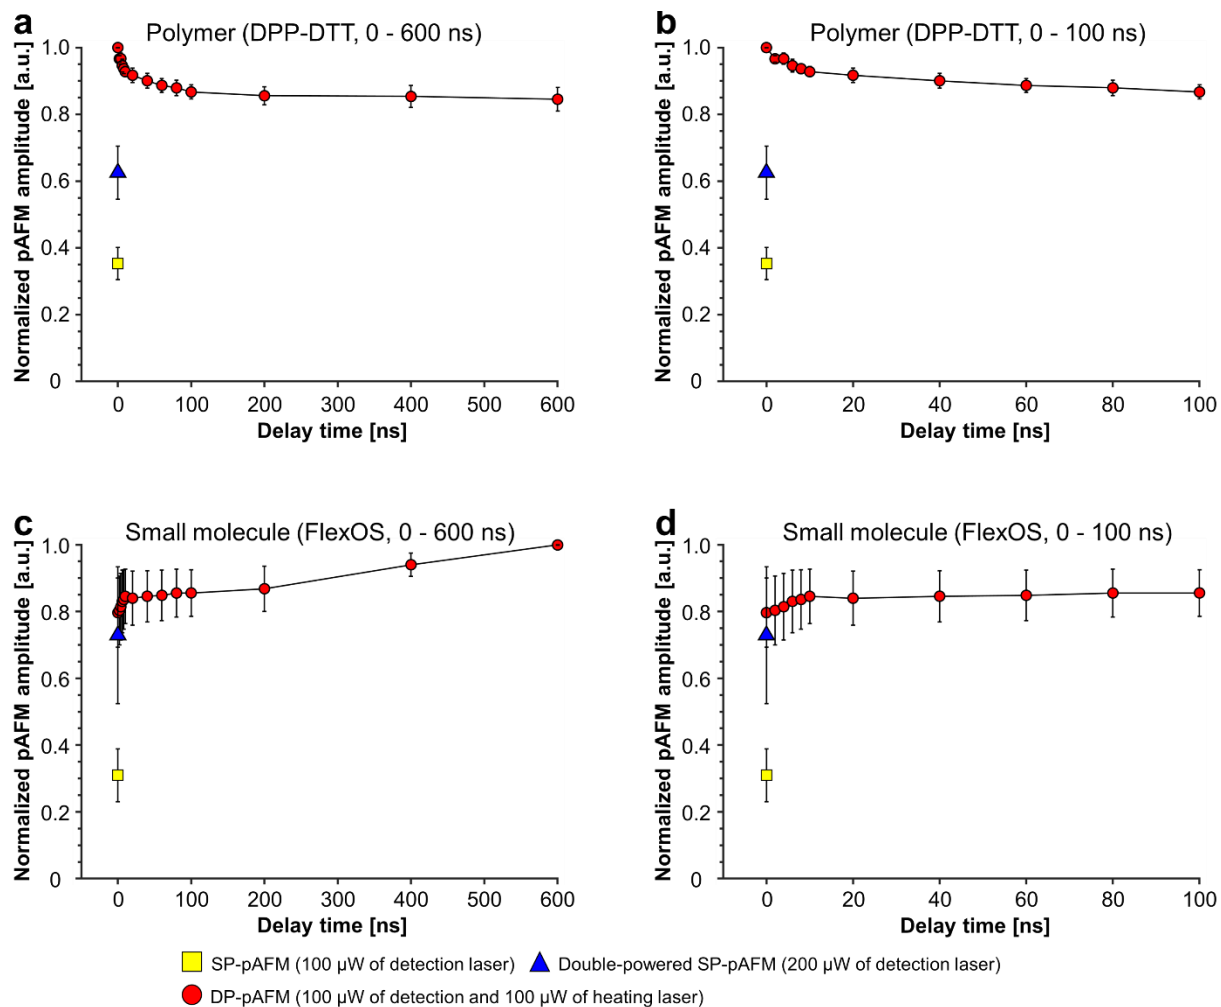

**Supplementary Figure 2.** Comparison of the signal amplitudes of SP-pAFM, double-powered SP-pAFM, and DP-pAFM in (a, b) DPP-DDT polymer and (c, d) FlexOS small molecule samples with time delays of less than 600 ns and 100 ns, respectively. SP-pAFM, single-pulse pAFM; DP-pAFM, dual-pulse pAFM.

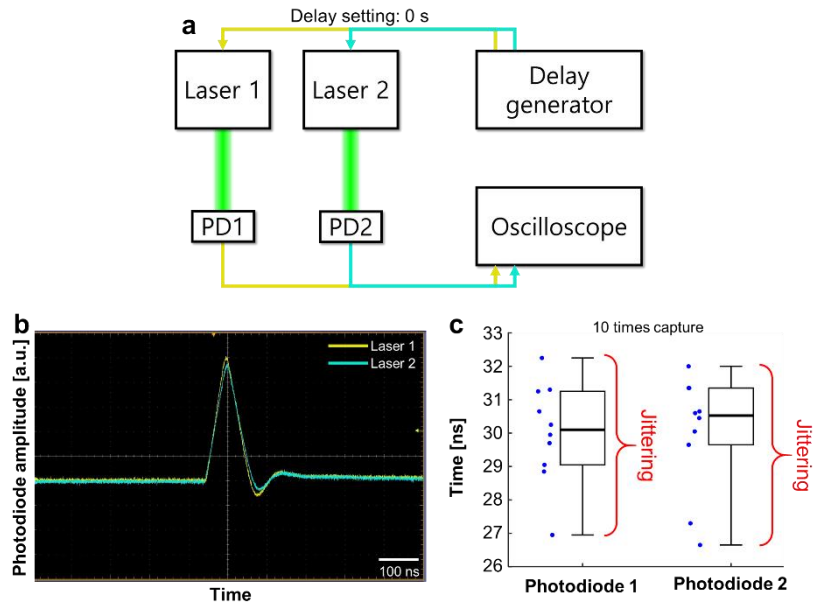

**Supplementary Figure 3.** Jittering measurement of heating and detection lasers. (a) Experiment schematic. (b) Photodiode responses of the two lasers captured by an oscilloscope. (c) Peak signals from two photodiodes

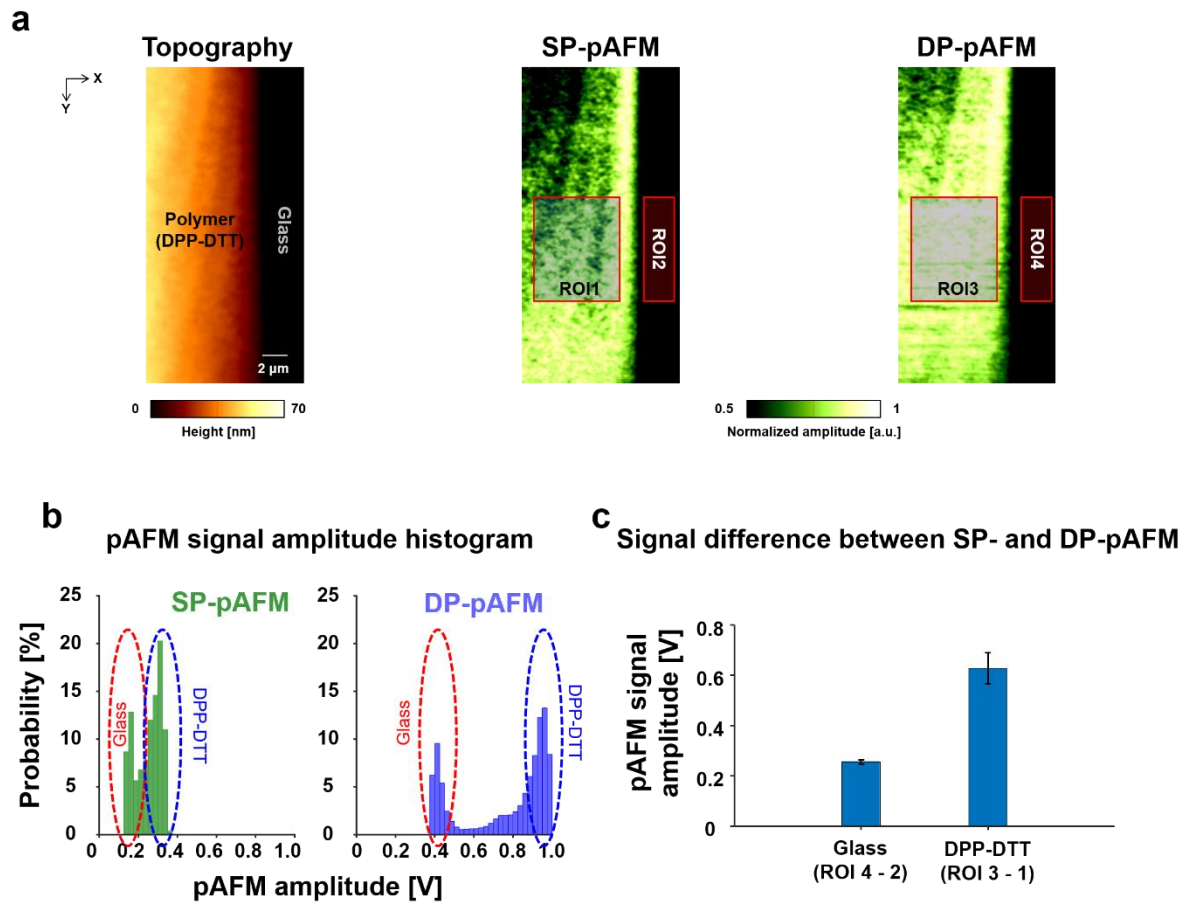

**Supplementary Figure 4.** Comparison of SP- and DP-pAFM signal amplitudes. (a) from left to right, AFM topography, SP-pAFM image, and DP-pAFM image of DPP-DDT polymer sample and glass substrate. (b) SP and DP-pAFM signal amplitude histograms. (c) Difference in signal amplitudes of SP and DP-pAFM. AFM, atomic force microscopy; SP-pAFM, single-pulse pAFM; DP-pAFM, dual-pulse pAFM.
